# Supplementary material for: ARID1A loss induces polymorphonuclear myeloid-derived suppressor cell chemotaxis and promotes prostate cancer progression
Source: PubMed Central journal article supplement (PMC9701216; doi:10.1038/s41467-022-34871-9), 2022-11-26
Supplement: 41467_2022_34871_MOESM1_ESM.pdf [file 41467_2022_34871_MOESM1_ESM.pdf]

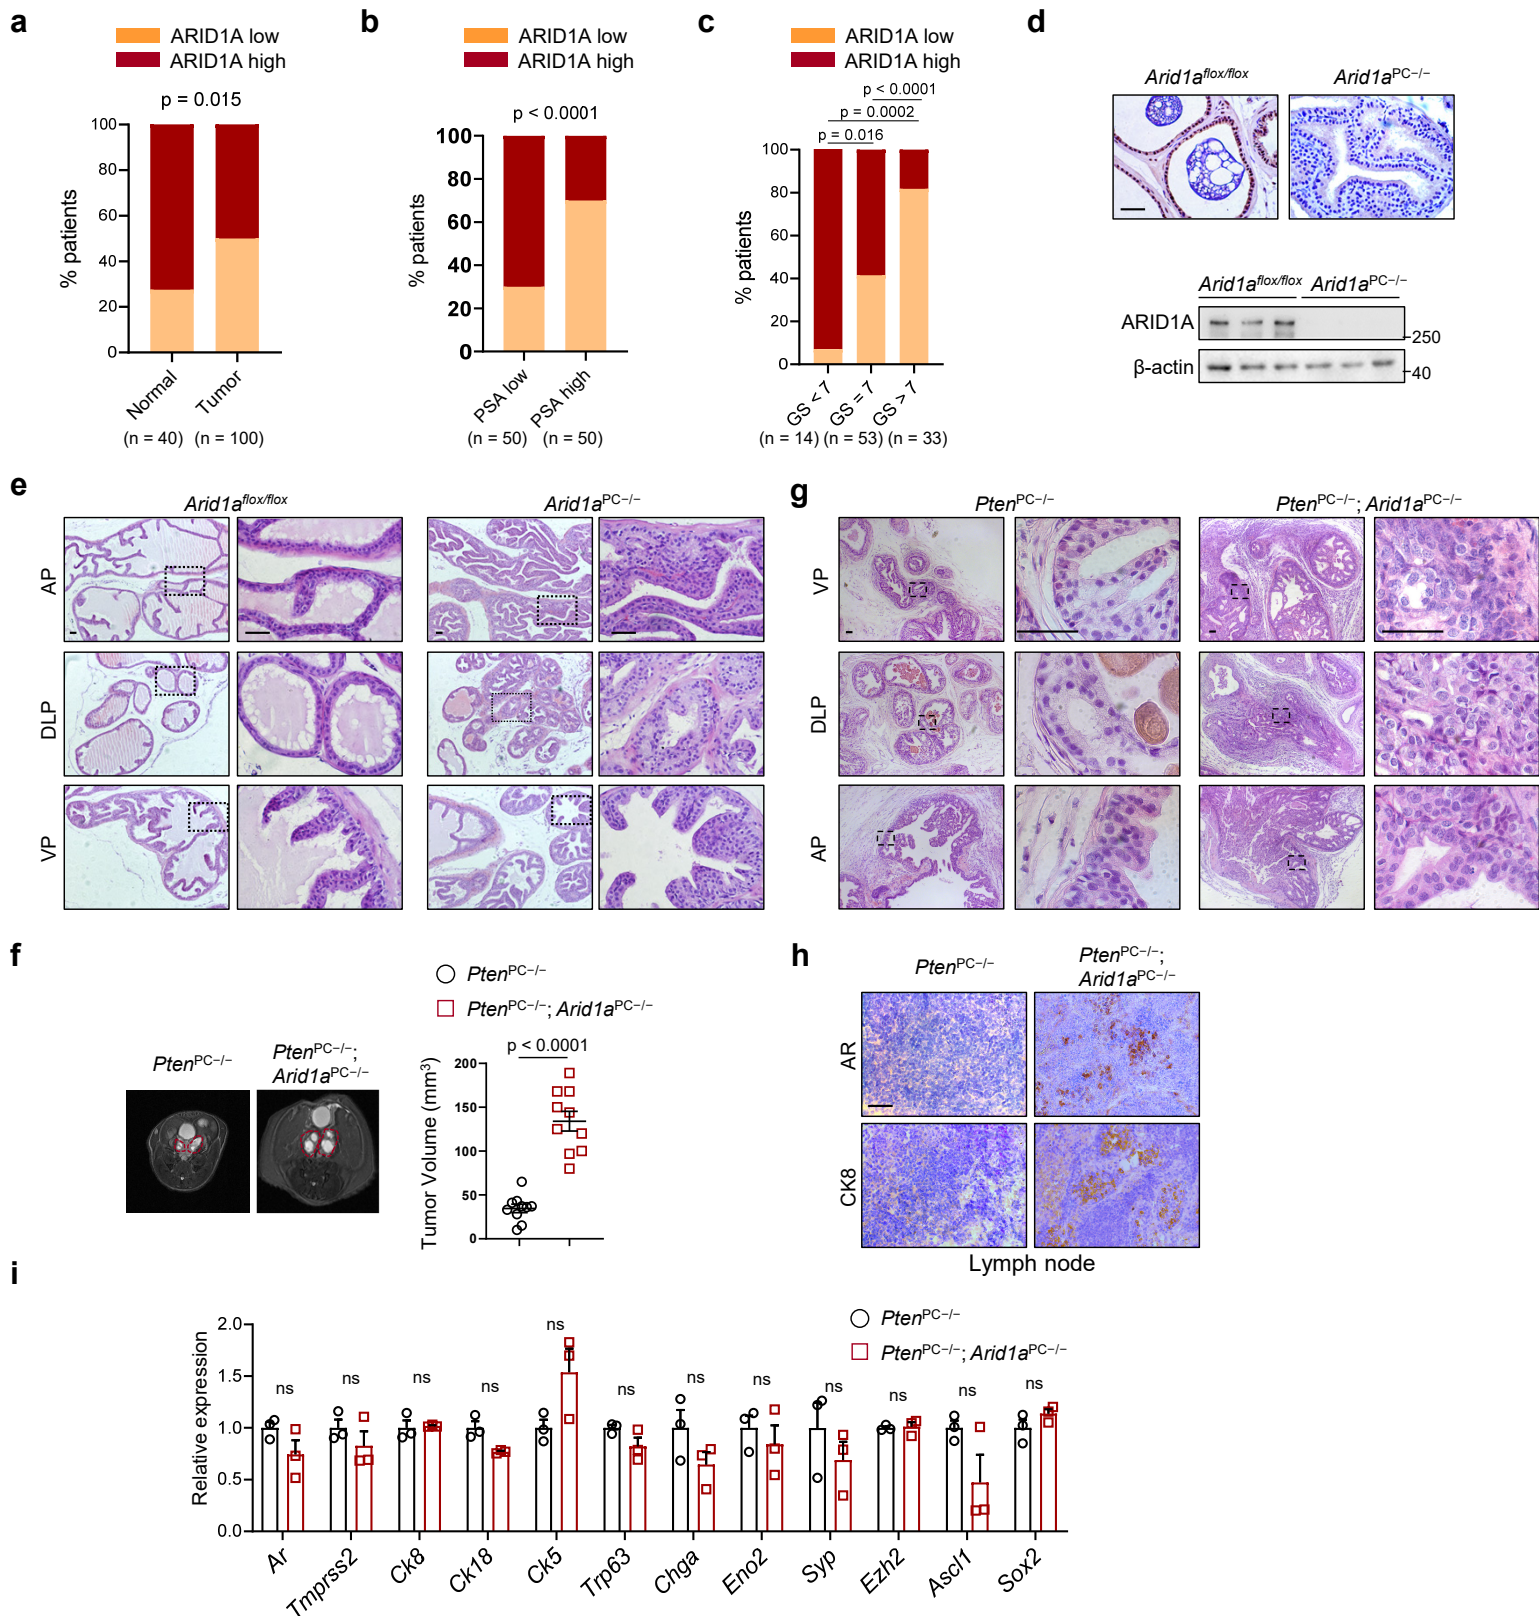

### Supplementary Figure 1. *Arid1a* inactivation promotes prostate tumorigenesis.

**a**, ARID1A staining indexes using a 10-point quantification scale in cohorts of normal prostate tissues ( $n = 40$ ) and tumors ( $n = 100$ ). **b**, ARID1A expression levels stratified by PSA in TMA ( $n = 100$ ). **c**, IHC score of ARID1A stratified by Gleason score (GS) in TMA ( $n = 100$ ). **d**, ARID1A-stained sections of representative DLP and IB analysis of tissues from 6-month-old *Arid1a*<sup>flox/flox</sup> and *Arid1a*<sup>PC-/-</sup> mice ( $n = 3$ ). Scale bar: 50  $\mu$ m. **e**, H&E-stained sections of representative AP, DLP, and VP in mice at 12 months of ages ( $n = 10$ , representative data are shown). Scale bar: 50  $\mu$ m. **f**, MRI analysis and quantitation of 16-week-old *Pten*<sup>PC-/-</sup> and *Pten*<sup>PC-/-</sup>; *Arid1a*<sup>PC-/-</sup> prostates ( $n = 10$ ). **g**, H&E-stained sections of 12-week-old *Pten*<sup>PC-/-</sup> and *Pten*<sup>PC-/-</sup>; *Arid1a*<sup>PC-/-</sup> mice ( $n = 15$ , representative data are shown). Scale bars, 50  $\mu$ m. **h**, AR and CK8 staining of lymph nodes from 12-week-old mice. Scale bar, 50  $\mu$ m. **i**, Relative expression of lineage markers in epithelium from 12-week-old mouse prostates ( $n = 3$ ), ns, no significance.

**f**, **i**, Data represent the mean  $\pm$  SEM. Statistical significance was determined by two-tailed  $\chi^2$  test (**a**, **b**, **c**) and two-tailed unpaired *t* test (**f**, **i**). Source data are provided as a Source Data file.

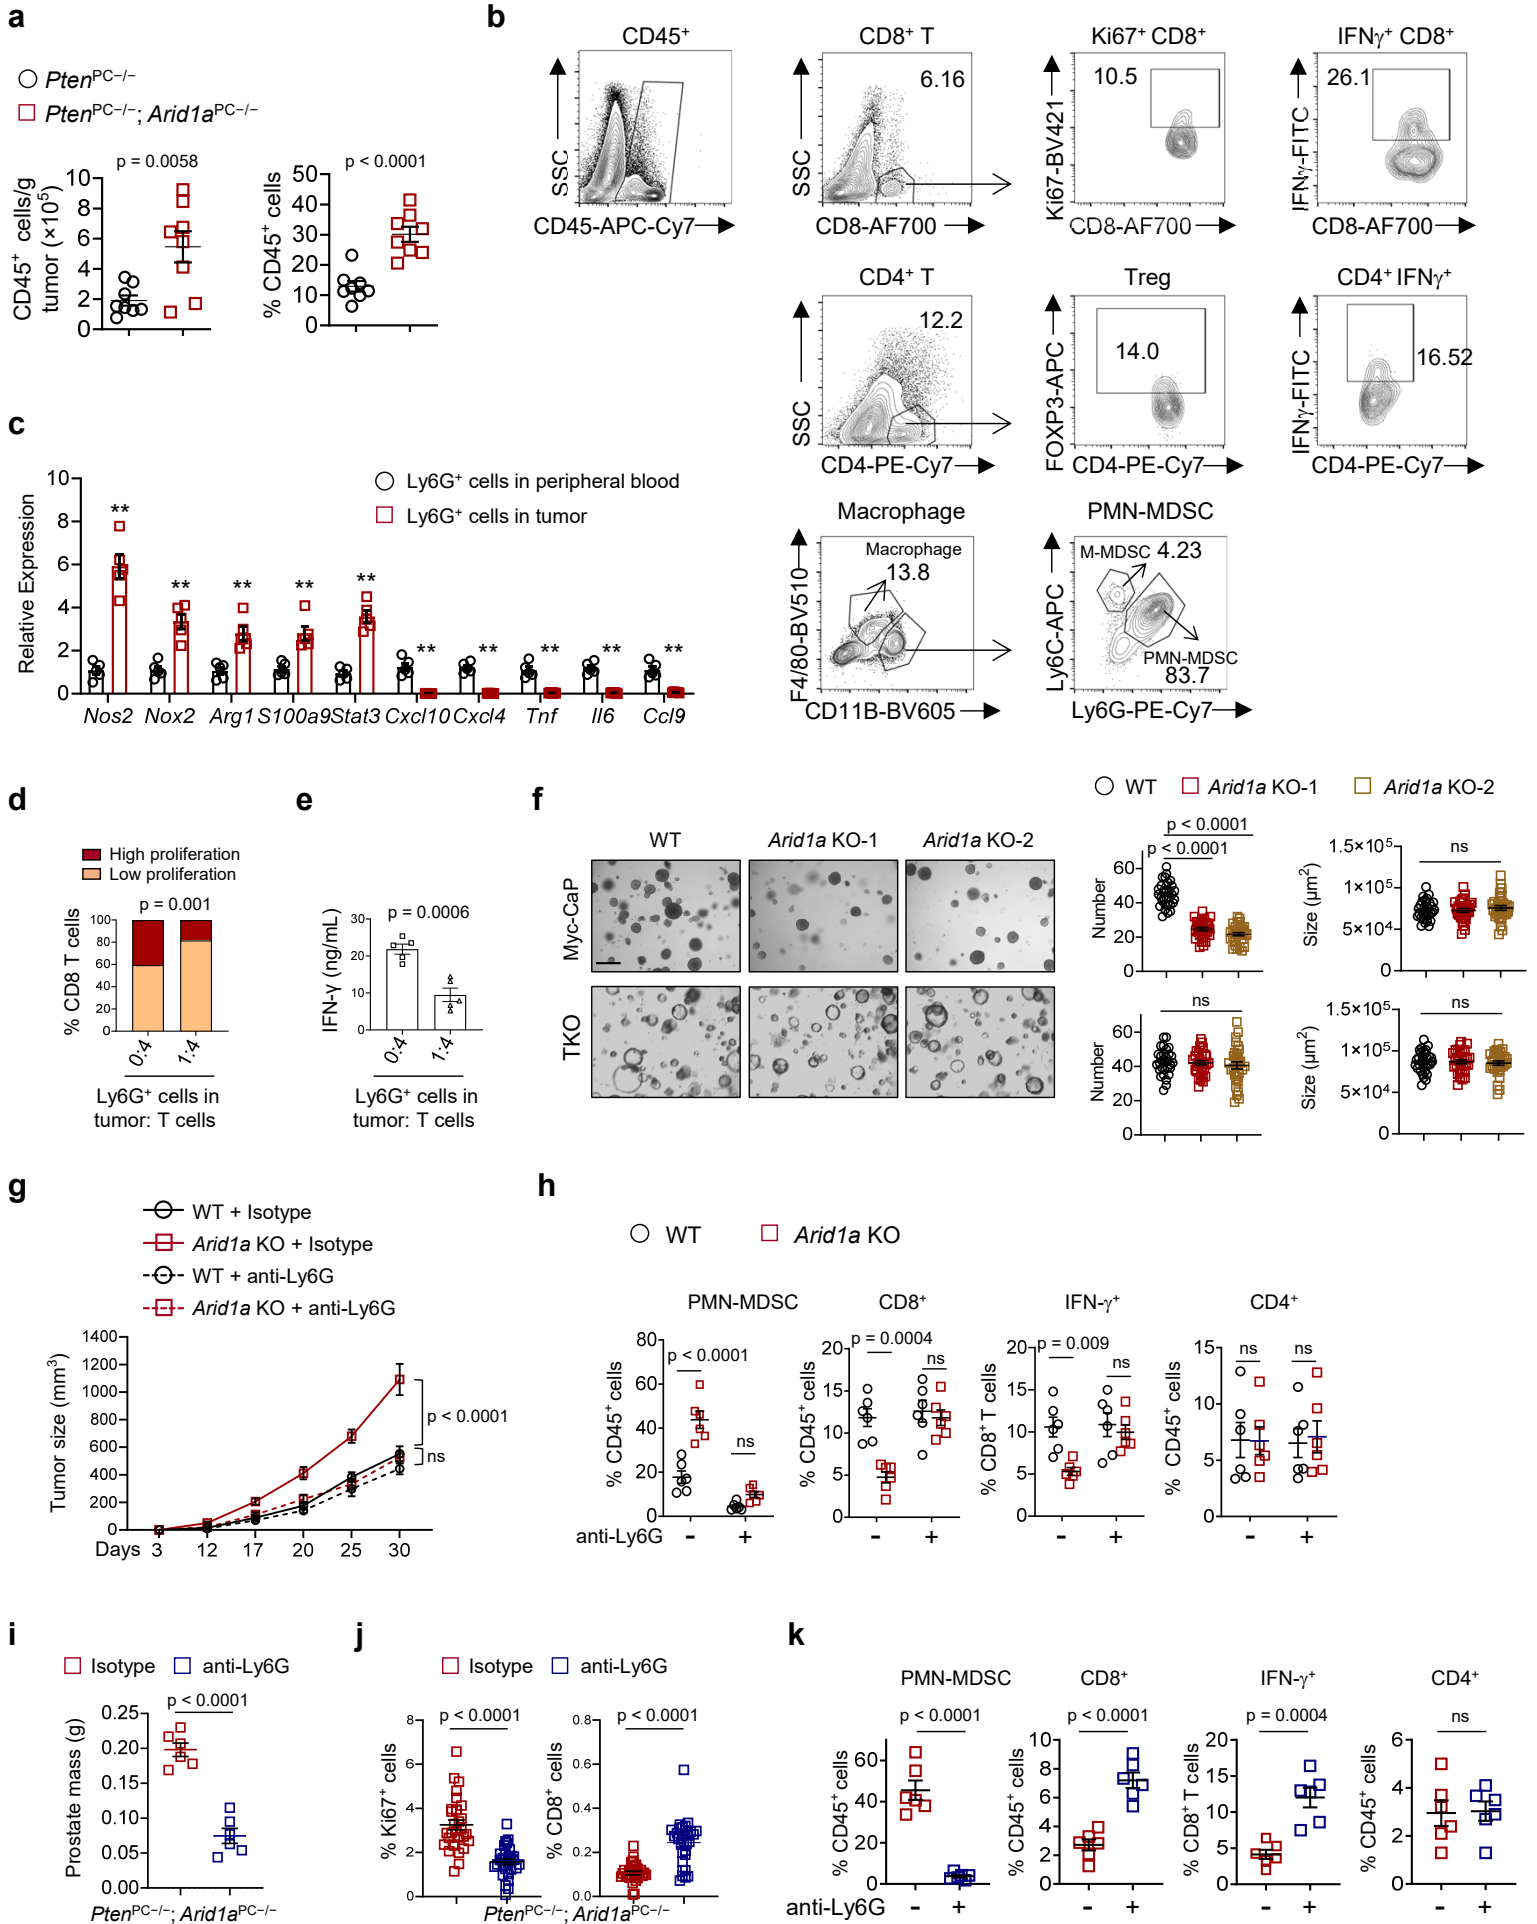

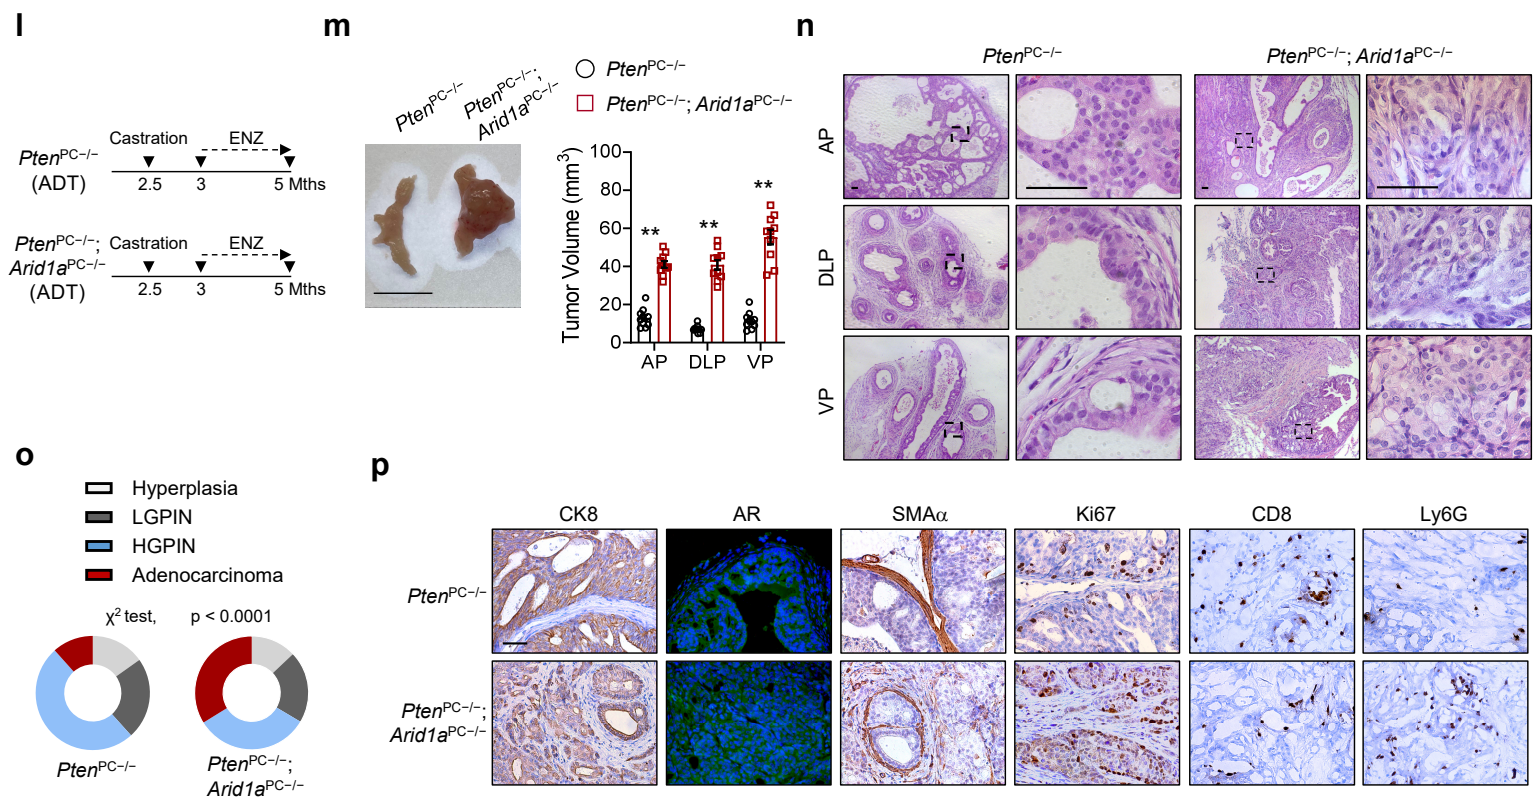

## Supplementary Figure 2. PMN-MDSC enrichment promotes the progression of *Arid1a*-deleted tumors.

**a**, Percentage of CD45<sup>+</sup> immune cells in 3-month-old *Pten*<sup>PC-/-</sup> and *Pten*<sup>PC-/-</sup>; *Arid1a*<sup>PC-/-</sup> prostate tumors (n = 8). **b**, Gating strategy for FACS analysis (Fig. 2c) is shown for tumor-infiltrating immune cells. The same strategy was used for the subsequent experiments. **c**, qRT-PCR analysis of Ly6G<sup>+</sup> cells from 3-month-old *Pten*<sup>PC-/-</sup>; *Arid1a*<sup>PC-/-</sup> prostate tumors and peripheral blood of WT mice (n = 5). *p* values for the individual gene expression in Ly6G<sup>+</sup> cells of peripheral blood and tumor: *Nos2* ( $p < 0.0001$ ), *Nox2* ( $p = 0.0004$ ), *Arg1* ( $p = 0.0017$ ), *S100a9* ( $p = 0.0019$ ), *Stat3* ( $p < 0.0001$ ), *Cxcl10* ( $p = 0.0001$ ), *Cxcl4* ( $p < 0.0001$ ), *Tnf* ( $p = 0.0001$ ), *Il6* ( $p < 0.0001$ ), *Ccl9* ( $p = 0.0001$ ). **d**, Summary of T cell proliferation assessed by CFSE flow cytometry after 4 days of co-culture. High and low proliferation were defined as T cell division  $\geq 2$  and  $\leq 1$ , respectively (n = 5). **e**, IFN- $\gamma$  secretion by CD8<sup>+</sup> T cells measured by ELISA (n = 5). **f**, Representative images of organoids and quantification as indicated (n = 10 fields from 3 experiments per group). Scale bar, 500  $\mu$ m. **g**, Volume of subcutaneous tumors derived from WT and *Arid1a* KO Myc-CaP cells with or without anti-Ly6G antibody treatment. WT + Isotype, WT + anti-Ly6G or *Arid1a* KO + anti-Ly6G (n = 12, each group); *Arid1a* KO + Isotype (n = 11). **h**, Quantification of tumor-infiltrating immune cells in WT and *Arid1a* KO Myc-CaP subcutaneous tumors with or without anti-Ly6G antibody treatment (n = 6). **i**, The prostate weights of *Pten*<sup>PC-/-</sup>; *Arid1a*<sup>PC-/-</sup> mice with or without anti-Ly6G administration. The treatment was performed twice a week for 4 weeks when the mice were 10-week-old (n = 6). **j**, Quantification of Ki67<sup>+</sup> and CD8<sup>+</sup> in prostate sections. **k**, Flow cytometry analysis of PMN-MDSCs, CD8<sup>+</sup> T cells and IFN $\gamma$ <sup>+</sup> CD8<sup>+</sup> T cells (n = 6). **l**, Graphical scheme describing the ADT strategy. **m**, Gross photographs and volume of prostates from the indicated mice with ADT (n = 10). Scale bar, 1 cm. *p* value for the prostatic volume: AP ( $p < 0.0001$ ), DLP ( $p < 0.0001$ ) and VP ( $p < 0.0001$ ). **n**, H&E-stained sections in 5-month-old *Pten*<sup>PC-/-</sup> and *Pten*<sup>PC-/-</sup>; *Arid1a*<sup>PC-/-</sup> prostates after ADT (n = 10, representative data are shown). Scale bars, 50  $\mu$ m. **o**, Quantification of histological grade from the indicated mice with ADT (n = 10). **p**, Immunohistochemical analysis in castrated prostate sections. Scale bar, 50  $\mu$ m.

**a**, **c**, **e-k**, **m**, Data represent the mean  $\pm$  SEM. Statistical significance was determined by two-tailed unpaired *t* test (**a**, **c**, **e**, **i-k**, **m**), Fisher's exact test (**d**), one-way ANOVA followed by multiple comparisons (**f**), two-way ANOVA followed by multiple comparison (**g**, **h**) and  $\chi^2$  test (**o**). **p**, Representative data of triplicate experiments are shown. Source data are provided as a Source Data file. \*\* $p < 0.01$ , ns, no significance.

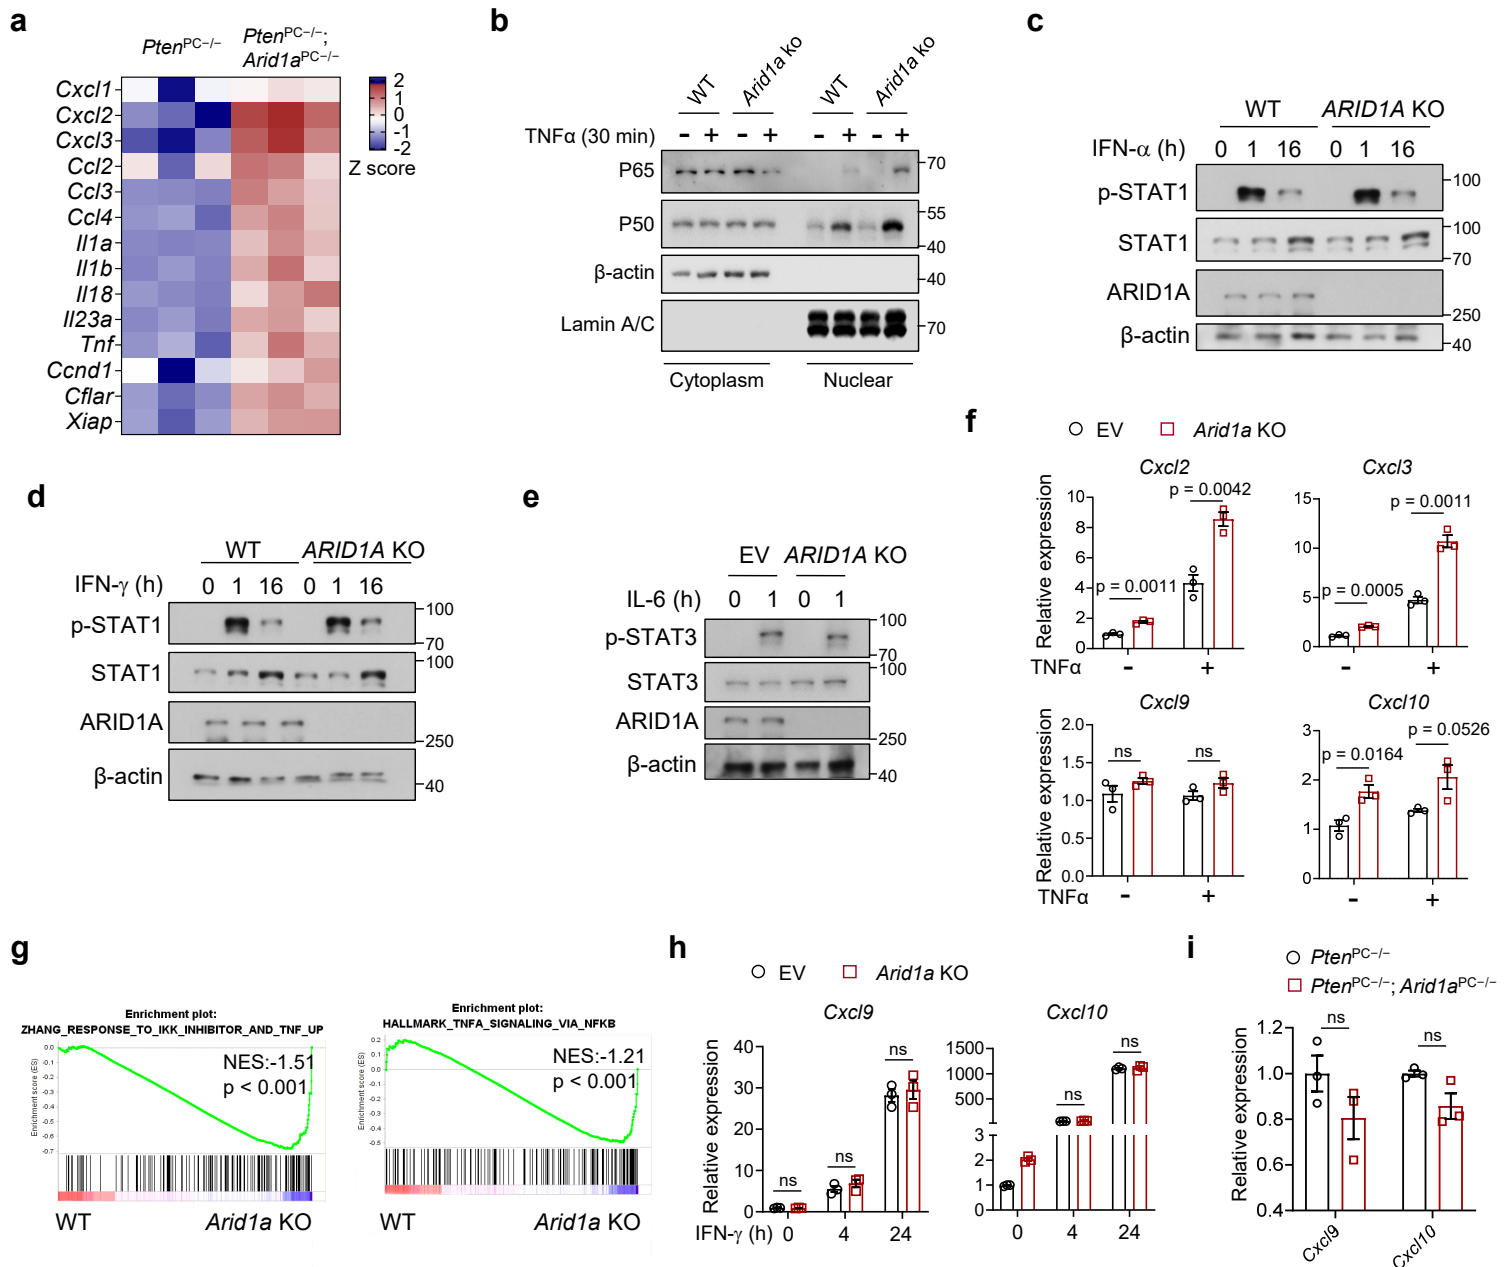

### Supplementary Figure 3. ARID1A loss activates NF- $\kappa$ B signaling to enhance the recruitment of MDSCs.

**a**, Heatmap summarizing the qRT-PCR results in epithelial cells of 3-month-old *Pten*<sup>PC-/-</sup> and *Pten*<sup>PC-/-</sup>; *Arid1a*<sup>PC-/-</sup> mouse prostates (n = 3). **b**, IB analysis of the indicated proteins in cytoplasmic extracts and nuclear extracts from Myc-CaP cells stimulated with TNF $\alpha$  (30 min). **c-e**, IB analysis of WT and *Arid1a*-KO Myc-CaP cells with or without IFN $\alpha$  (**c**), IFN $\gamma$  (**d**) and IL-6 (**e**) stimulation. **f**, The qRT-PCR results in WT and *Arid1a* KO Myc-CaP cells with or without TNF $\alpha$  stimulation (n = 3). **g**, Hyperactivation of NF- $\kappa$ B in *Arid1a*-depleted Myc-CaP cells analyzed by GSEA. NES, normalized enrichment score. *p* value was determined by GSEA. **h**, *Cxcl9* and *Cxcl10* transcripts were quantified by real-time PCR in sg*Arid1a*- and vector-expressing Myc-CaP cells stimulated with IFN $\gamma$  at the indicated time points (n = 3). **i**, *Cxcl9* and *Cxcl10* transcripts were quantified by real-time PCR in epithelial cells of 3-month-old *Pten*<sup>PC-/-</sup> and *Pten*<sup>PC-/-</sup>; *Arid1a*<sup>PC-/-</sup> prostates (n = 3). **f, h, i**, Data represent the mean  $\pm$  SEM and statistical significance was determined by two-tailed unpaired *t* test. **b-e**, Data were evaluated in triplicate, and representative data are shown. Unprocessed immunoblots are shown as source data. ns, no significance.

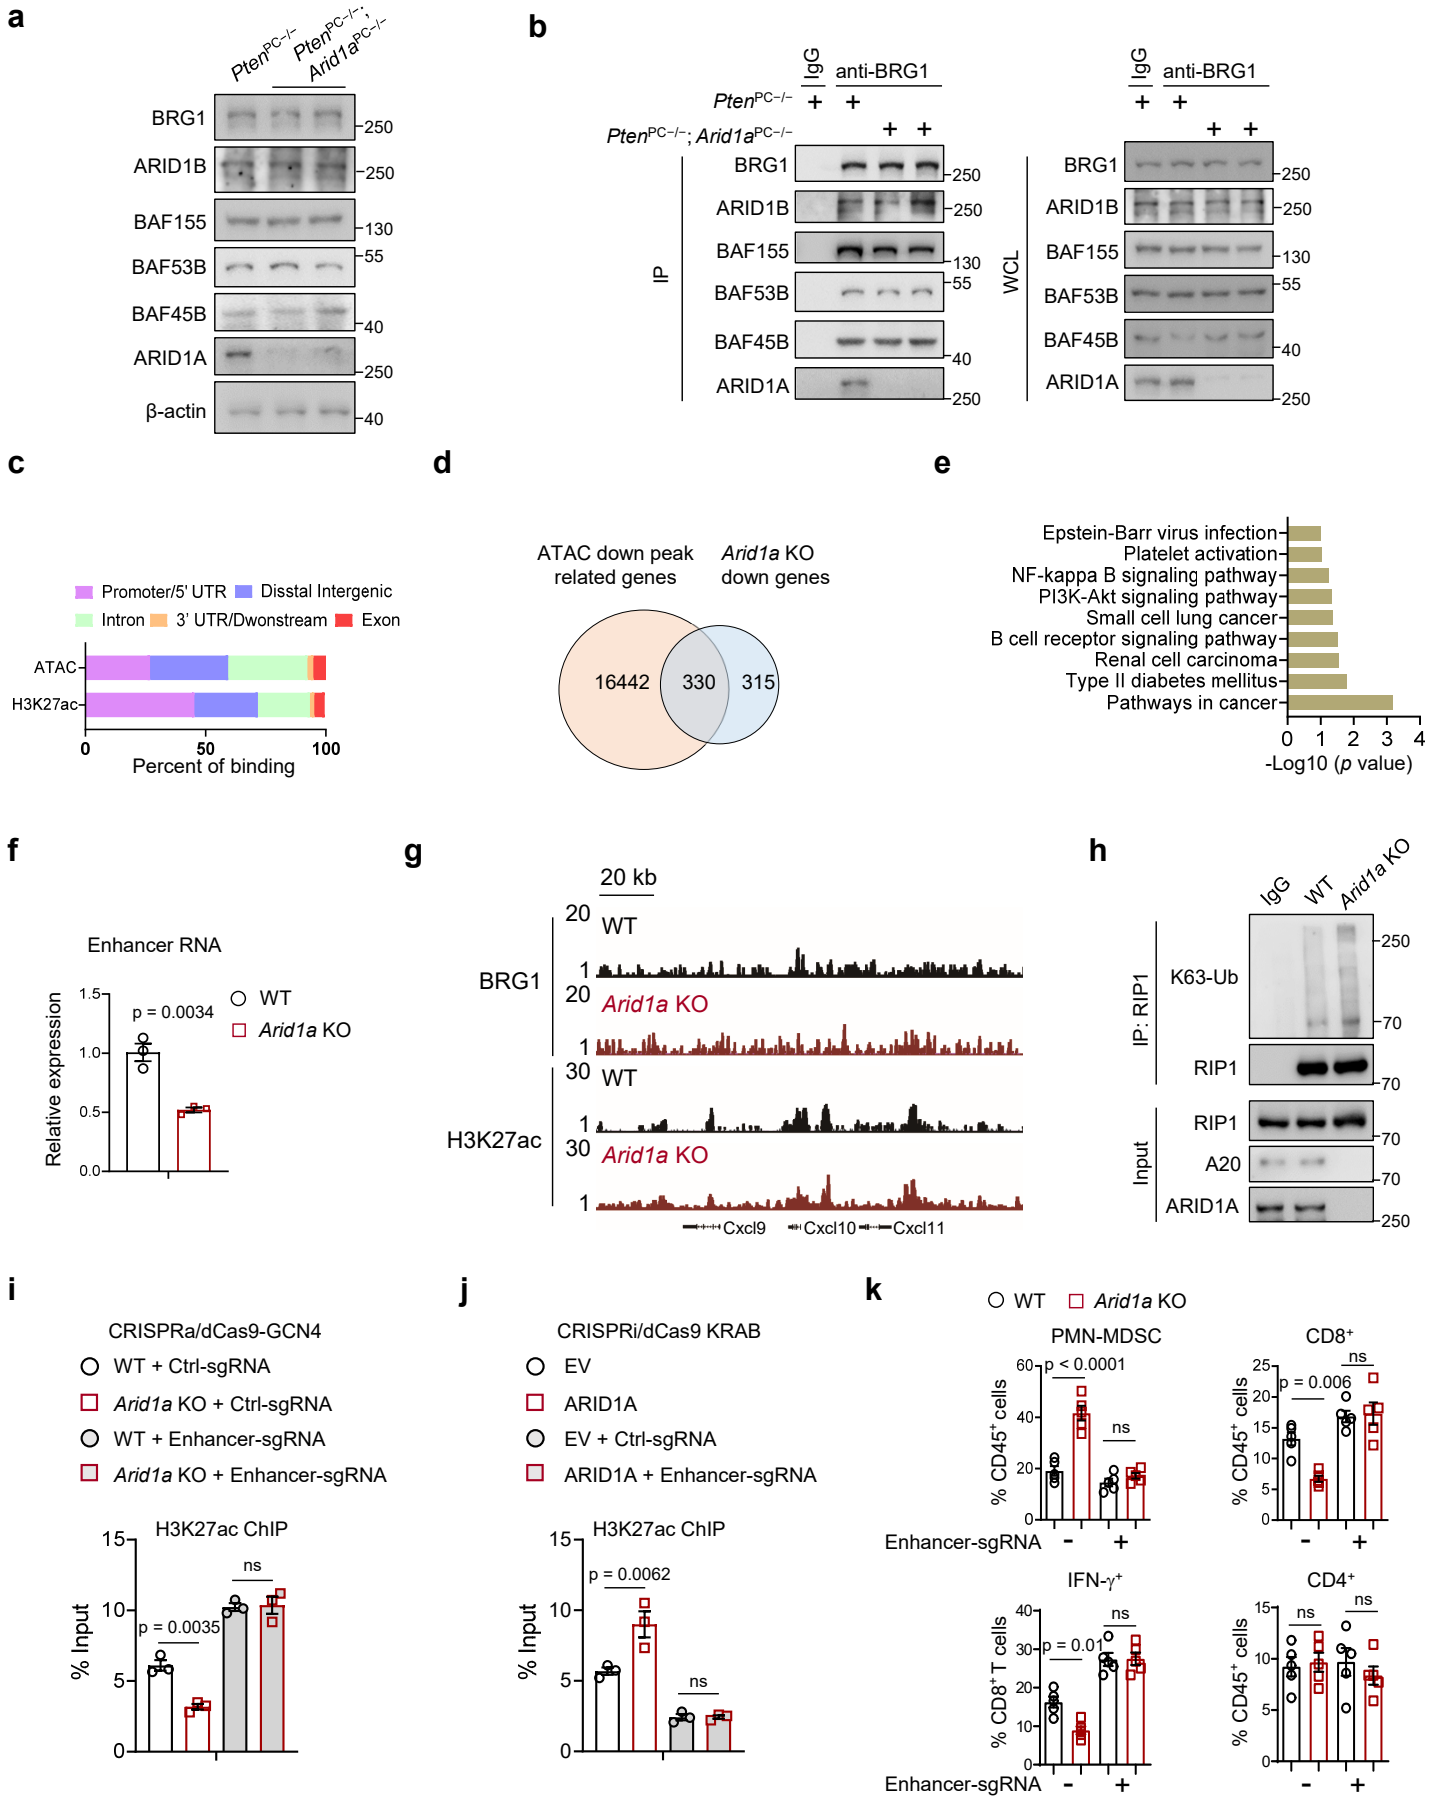

**Supplementary Figure 4. *Arid1a* ablation silences the enhancer of the *A20* gene to stimulate NF- $\kappa$ B signaling.**

**a**, IB analysis of the indicated protein in 3-month-old *Pten*<sup>PC-/-</sup> and *Pten*<sup>PC-/-</sup>; *Arid1a*<sup>PC-/-</sup> mouse prostates. **b**, IB analysis of the whole-cell lysate (WCL) from 12-week-old *Pten*<sup>PC-/-</sup> and *Pten*<sup>PC-/-</sup>; *Arid1a*<sup>PC-/-</sup> prostates and anti-BRG1 immunoprecipitates as indicated. **c**, Bar charts revealing the distributions of ATAC-seq peaks and H3K27ac ChIP-seq peaks in vector-expressing Myc-CaP cells. **d**, Venn diagram of the genes showing the reduced accessibility and expression simultaneously in *Arid1a* KO Myc-CaP cells compared to WT cells. **e**, GO-BP enrichment of the overlapped 85 genes by DAVID, ranked according to *p* value. **f**, *A20* enhancer RNA were quantified by real-time PCR (n = 3). **g**, ChIP-seq tracks of BRG1 and H3K27ac signals in *Cxcl9*, *Cxcl10* and *Cxcl11* gene loci, as indicated. **h**, IB analyses of the WCL and anti-RIP1 immunoprecipitates of Myc-CaP cells. Cells were treated with 20 ng/ml TNF $\alpha$  for 30 min before harvesting. **i**, ChIP-qPCR assays of H3K27ac at the *A20* enhancer in WT and *Arid1a* KO Myc-CaP cells with or without *A20* enhancer activation (CRISPRa/dCas9-based induction, n = 3). **j**, ChIP-qPCR assays of H3K27ac at the *A20* enhancer in WT and ARID1A overexpressing Myc-CaP cells with or without *A20* enhancer silencing (CRISPRi/dCas9-based suppression, n = 3). **k**, Quantification of tumor-infiltrating immune cells in WT and *Arid1a* KO tumors with or without *A20* enhancer activation by FACS (n = 5). **f, i-k**, Data represent the mean  $\pm$  SEM and statistical significance was determined by two-tailed unpaired *t* test. **a, b, h**, Experiments were repeated three times independently with similar results; data from one representative experiment are shown. Source data are provided as a Source Data file. ns, no significance.

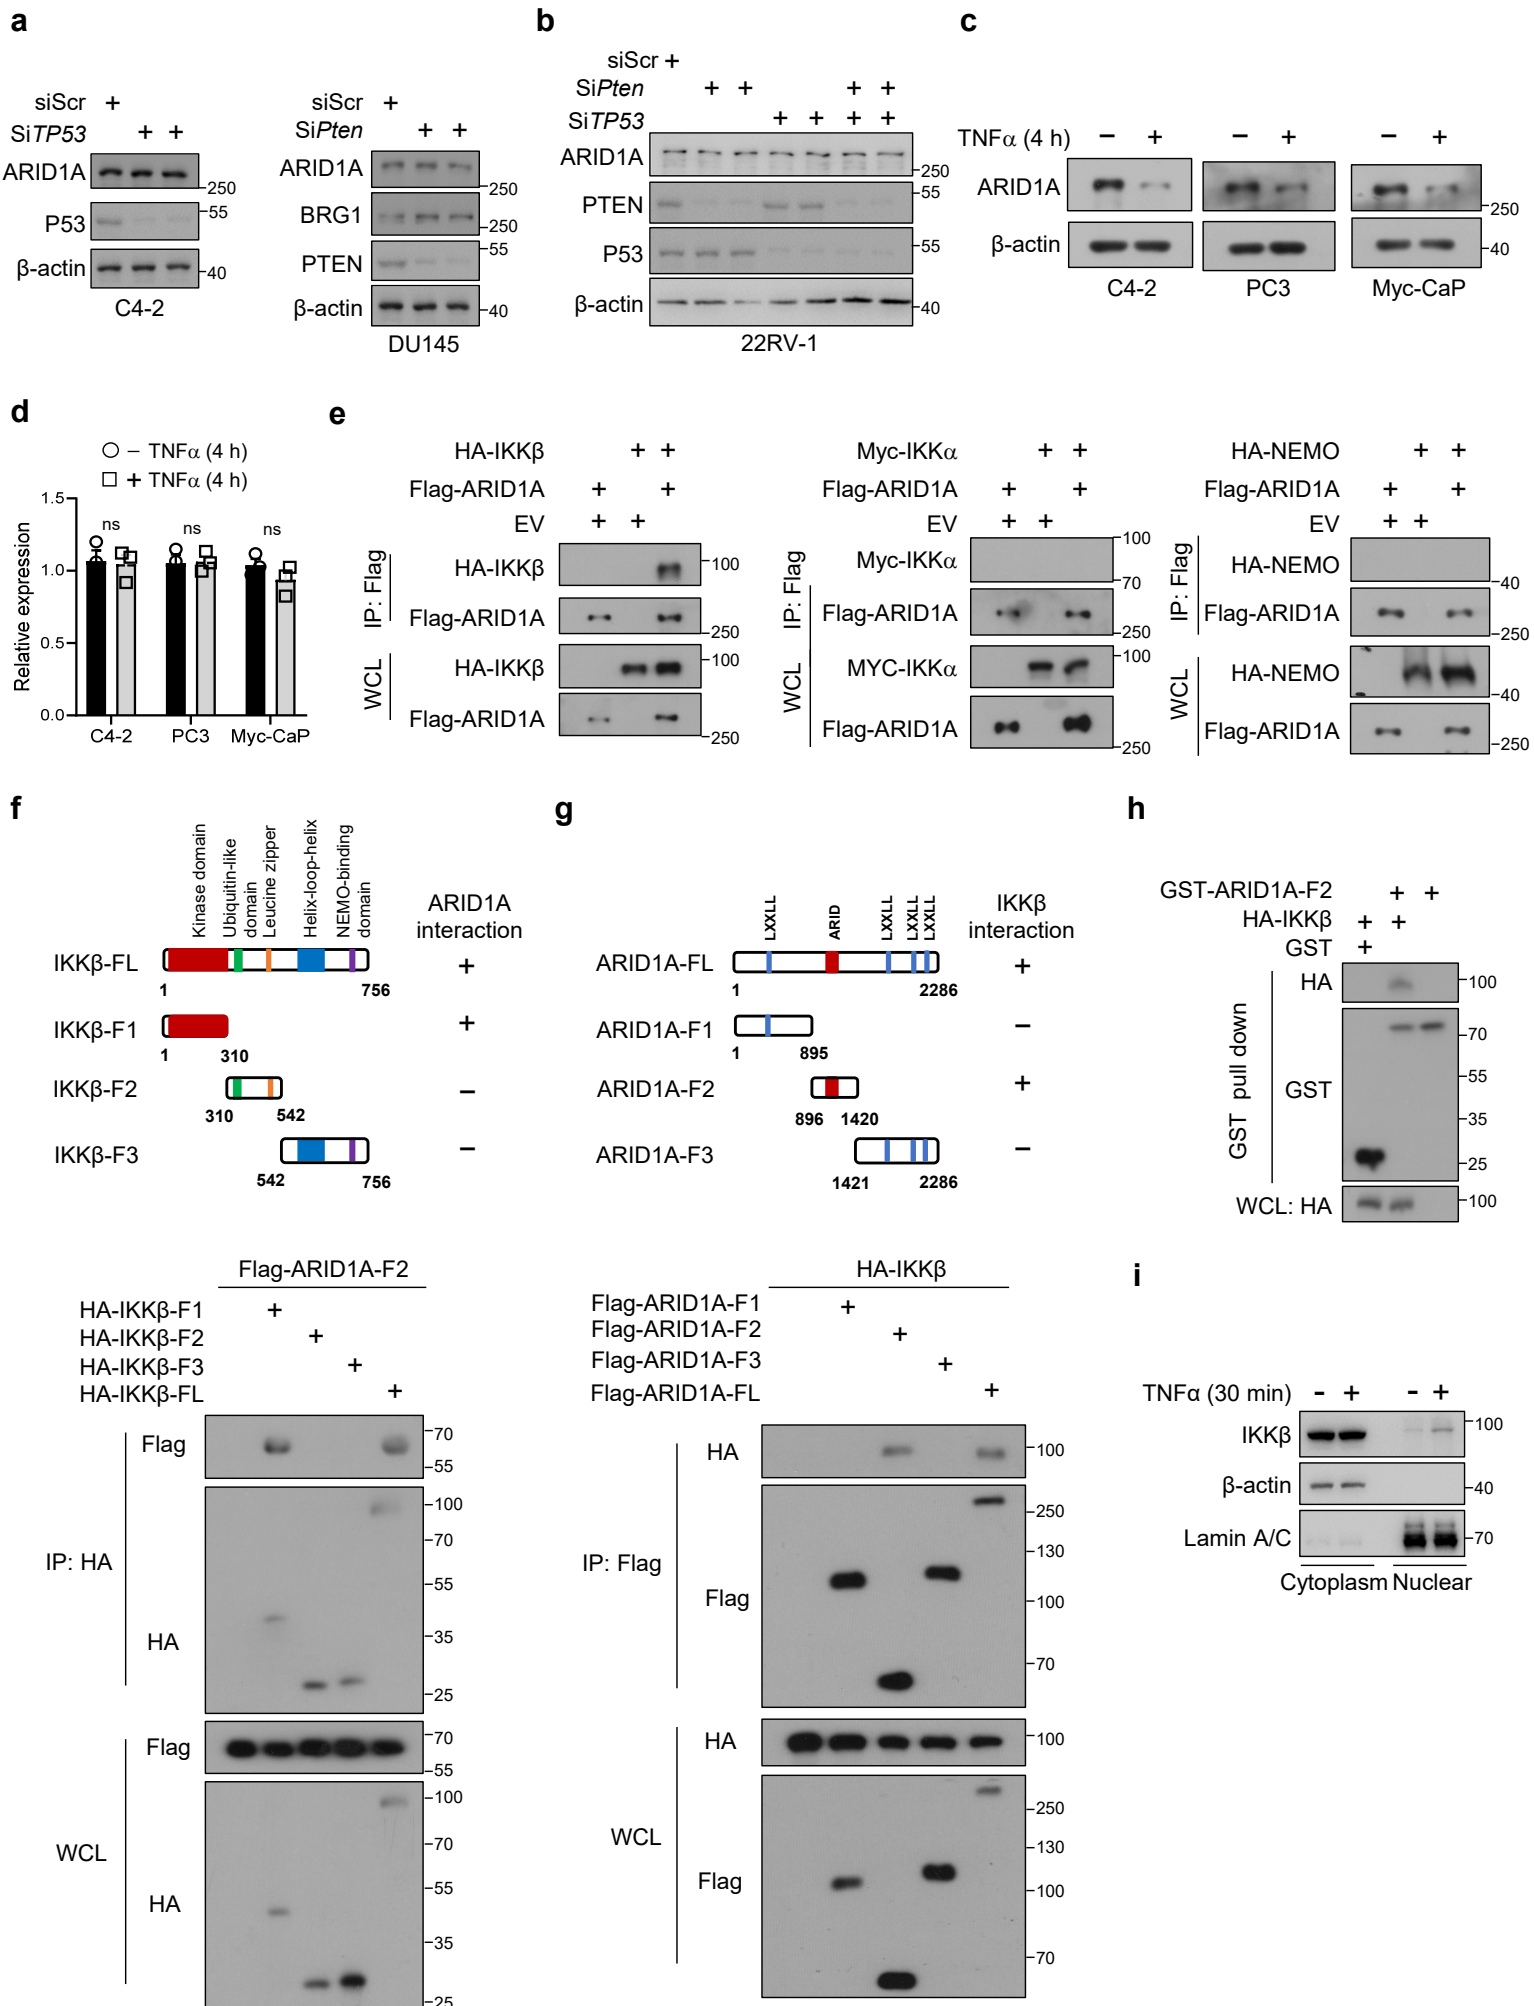

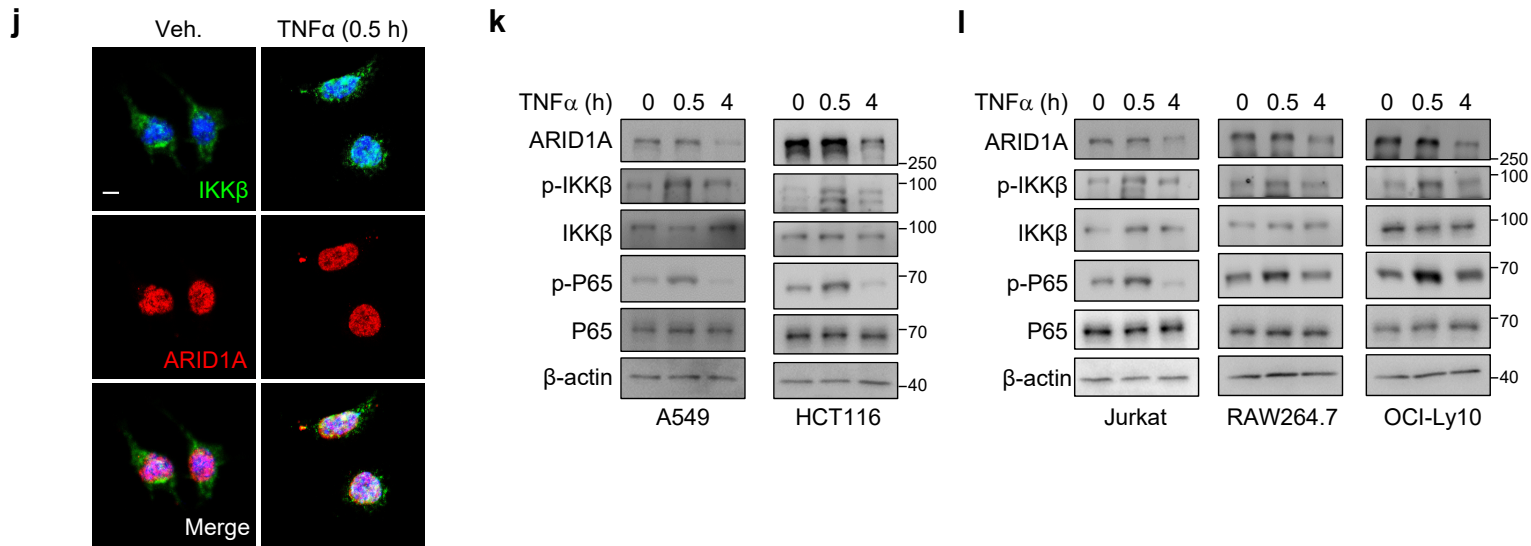

### Supplementary Figure 5. IKK $\beta$ promotes ARID1A reduction in PCa cells.

**a**, IB analysis of C4-2 and DU145 cells with *TP53* or *Pten* KD, respectively. **b**, IB analysis of 22RV-1 cells with *TP53* an/or *Pten* KD. **c**, IB analysis of C4-2, PC3 and Myc-CaP cells treated with TNF $\alpha$  for the indicated duration of time. **d**, *ARID1A* transcripts were quantified by real-time PCR in PCa cells with or without TNF $\alpha$  stimulation (n = 3), ns, no significance. **e**, IB analysis of the indicated protein in the WCL and immunoprecipitates from 293T cells transfected with Flag-ARID1A and HA-IKK $\beta$ , Myc-IKK $\alpha$  or HA-NEMO. **f**, Interaction between ARID1A and IKK $\beta$ . Flag-ARID1A-F2 and HA-IKK $\beta$  full-length (IKK $\beta$ -FL) and mutants (IKK $\beta$ -F1, IKK $\beta$ -F2, IKK $\beta$ -F3) were ectopically expressed in 293T cells, followed by anti-HA immunoprecipitation and immunoblotting with Flag and HA antibodies. **g**, HA-IKK $\beta$  and Flag-ARID1A full-length (ARID1A-FL) and mutants (ARID1A-F1, ARID1A-F2, ARID1A-F3) were ectopically expressed in 293T cells, followed by anti-Flag immunoprecipitation and immunoblotting. **h**, In vitro binding of ARID1A-F2 to IKK $\beta$  by GST pulldown analysis. **i**, IB analysis of the indicated proteins in cytoplasmic extracts and nuclear extracts from Myc-CaP cells stimulated with TNF $\alpha$ . **j**, IKK $\beta$  and ARID1A immunostaining as indicated in Myc-CaP cells. Scale bar, 100  $\mu$ m. **k**, IB analysis of A549 and HCT116 cells treated with TNF $\alpha$  for the indicated duration of time. **l**, IB analysis of Jurkat, RAW264.7 and OCI-Ly10 cells treated with TNF $\alpha$  for the indicated duration of time.

**d**, Data represent the mean  $\pm$  SEM and statistical significance was determined by two-tailed unpaired *t* test. All experiments were repeated three times independently with similar results; data from one representative experiment are shown. Source data are provided as a Source Data file.



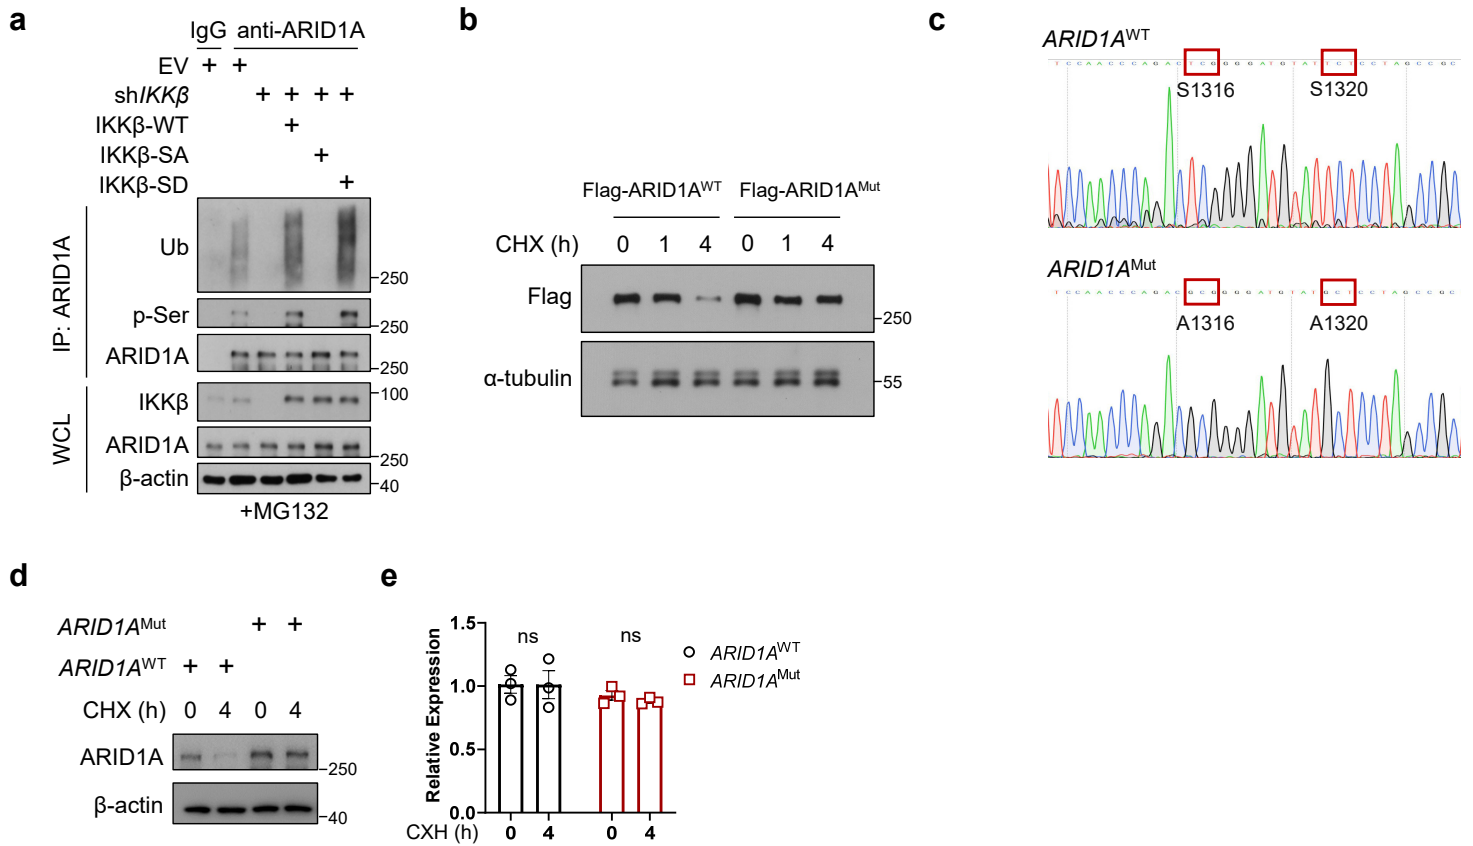

**Supplementary Figure 6. IKKβ phosphorylates ARID1A and promotes its β-TRCP-dependent degradation.**

**a**, IB analysis of the WCL and immunoprecipitates of the indicated proteins in C4-2 control and *IKKβ* KD cells with or without *IKKβ*-WT, *IKKβ*-SA or *IKKβ*-SD overexpression. **b**, IB analysis of 293T cells with WT or mutant *ARID1A* overexpression treated with TNFα for the indicated duration of time. **c**, Sequencing validations of the CRISPR *ARID1A*-SA knock-in allele in C4-2 cells. **d**, IB analysis of WT and *Arid1a*<sup>mut</sup> Myc-CaP cells with or without CHX treatment for the indicated duration of time. **e**, *Arid1a* transcripts were quantified by real-time PCR. ns, no significance.

**e**, Data represent the mean ± SEM and statistical significance was determined by two-tailed unpaired *t* test. **a**, **b**, **d**, Experiments were repeated three times independently with similar results; data from one representative experiment are shown. Source data are provided as a Source Data file.

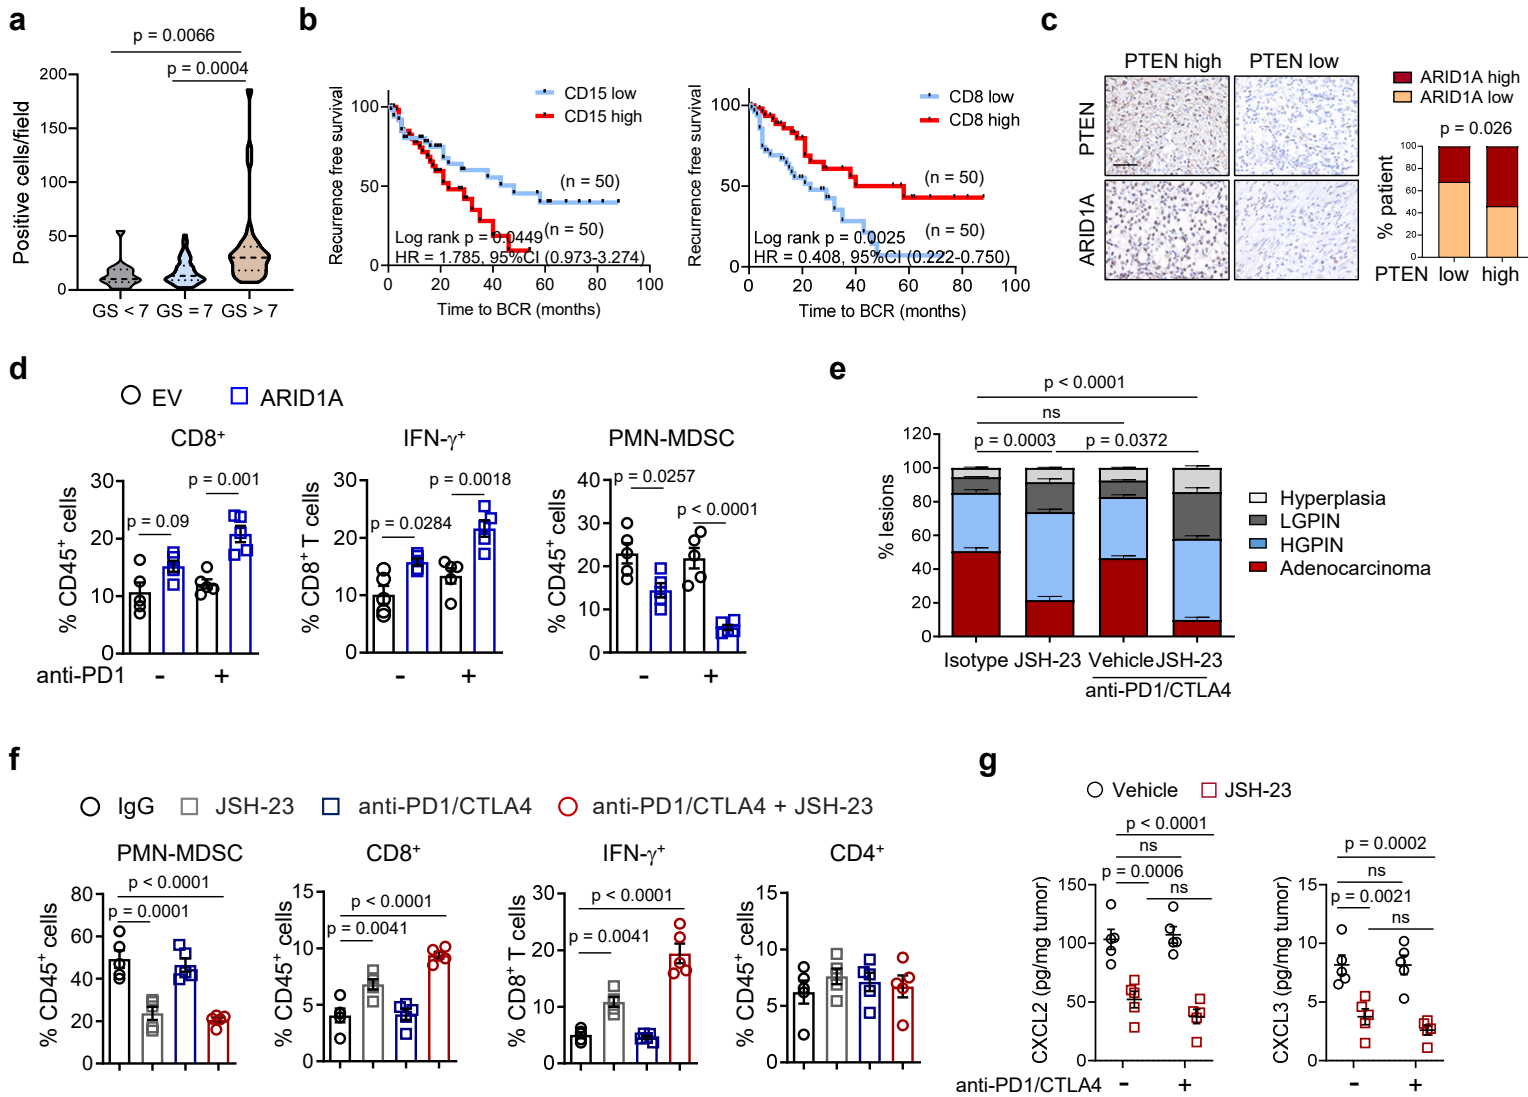

### Supplementary Figure 7. Targeting ARID1A or its coordinated signals increase the sensitivity to ICB therapy.

**a**, CD15 expression levels stratified by GS in TMA (GS < 7,  $n = 14$ , GS = 7,  $n = 53$ , GS > 7,  $n = 33$ ). **b**, Kaplan-Meier plot of recurrence after radical prostatectomy based on the proportions of CD15<sup>+</sup> and CD8<sup>+</sup> cells in patients ( $n = 50$  for each group). **c**, IHC analysis for ARID1A and PTEN. Scale bars, 50  $\mu$ m. The correlation between PTEN and ARID1A expression is shown as stacked columns ( $n = 100$ ). **d**, Quantification of each tumor-infiltrating immune cell population in WT and ARID1A-overexpressing Myc-CaP xenografts with or without anti-PD-1 treatment ( $n = 5$ ). **e**, Prostate tumor histology of *Pten*<sup>PC-/-</sup>; *Arid1a*<sup>PC-/-</sup> mice with or without NF- $\kappa$ B inhibition (JSH-23) in combination with anti-PD1/CTLA-4 treatment ( $n = 10$ ). **f**, Quantification of the indicated tumor-infiltrating immune cell population of *Pten*<sup>PC-/-</sup>; *Arid1a*<sup>PC-/-</sup> mouse prostates with or without JSH-23 treatment in combination with anti-PD1/CTLA-4 therapy ( $n = 5$ ). **g**, ELISA of CXCL2 and CXCL3 in prostate tumors of 4-month-old *Pten*<sup>PC-/-</sup>; *Arid1a*<sup>PC-/-</sup> mice treated as indicated ( $n = 5$ ).

**d-g**, Data represent the mean  $\pm$  SEM. Statistical significance was determined by one-way ANOVA followed by multiple comparisons (**a**), log-rank test (**b**),  $\chi^2$  test (**c**, **e**) and two-way ANOVA followed by multiple comparisons (**d**, **f**, **g**). Source data are provided as a Source Data file. ns, no significance.

Supplementary Table 1. Clinical Summary of Tissue Microarray from PCa Patients, Related to Figure 1 and Figure 7

| Variables                            | tumor                  | Benign Prostatic Hyperplasia |
|--------------------------------------|------------------------|------------------------------|
| Numbers                              | 100                    | 40                           |
| Age at diagnosis, yr                 | 50-82 (mean 67.8)      |                              |
| Year of surgery                      | 2012/8-2020/3          |                              |
| PSA at diagnosis, ng/ml              | 0.48-157.9 (mean 25.4) |                              |
| Pathologic Gleason score, n (%)      |                        |                              |
| 6                                    | 14 (14)                |                              |
| 7                                    | 53 (53)                |                              |
| 8                                    | 14 (14)                |                              |
| 9                                    | 18 (18)                |                              |
| 10                                   | 1 (1)                  |                              |
| No. of biochemical recurrence, n (%) | 39 (39)                |                              |
| Adverse pathologic events, n (%)     |                        |                              |
| Extra-prostatic extension            | 18 (18)                |                              |
| Seminal vesicle invasion             | 15 (15)                |                              |
| Positive surgical margins            | 2 (2)                  |                              |

Supplementary Table 2. Clinical Summary of Tumor Tissue Specimens from Advanced PCa Patients, Related to Figure 7

| Variables                                            | Adenocarcinoma           |
|------------------------------------------------------|--------------------------|
| Numbers                                              | 42                       |
| Age at diagnosis, yr                                 | 49-79 (mean 68)          |
| PSA at diagnosis, ng/ml                              | 0.07-359.87 (mean 58.25) |
| Pathologic Gleason score at initial diagnosis, n (%) |                          |
| 8                                                    | 10 (23.8)                |
| 9                                                    | 28 (66.7)                |
| 10                                                   | 4 (9.5)                  |
| Samples from body sites, n (%)                       | Prostate, 42 (100%)      |

Supplementary Table 3. Oligonucleotides

| Oligonucleotides                |                                                                                                                              |
|---------------------------------|------------------------------------------------------------------------------------------------------------------------------|
| siP50-1                         | CGCCUGAAUUCUUCGUAU                                                                                                           |
| siP50-2                         | CCAGAGUUUACAUCUGAUG                                                                                                          |
| siP52-1                         | ACAUUGAGGUUCGGUUCUA                                                                                                          |
| siP52-2                         | GGACAUGACUGCCCAAUUU                                                                                                          |
| siP65-1                         | CGGAUUGAGGAGAAACGUA                                                                                                          |
| siP65-2                         | AUGGAUUCAUUACAGCUUA                                                                                                          |
| siIKK $\alpha$ -1               | GCAGAUGACGUUUGGUAUA                                                                                                          |
| siIKK $\alpha$ -2               | UAGGGUCUGGGAUUCGAUA                                                                                                          |
| siIKK $\beta$ -1                | CCAGCCAAGAAGAGUGAAG                                                                                                          |
| siIKK $\beta$ -2                | GCUGGUUCAUAUCUUGAAC                                                                                                          |
| siNEMO-1                        | GAGGGAGUACAGCAAACUG                                                                                                          |
| siNEMO-2                        | GCUCGAUCUGAAGAGGCAG                                                                                                          |
| siPTEN-1                        | GCAGAUAAUGACAAGGAUUAUUA                                                                                                      |
| siPTEN-2                        | GGUGAAGAUUAUUCUCCAUA                                                                                                         |
| siTRP53-1                       | GGAGTATTTGGATGACAG                                                                                                           |
| siTRP53-2                       | AACCUCUUGGUGAACCUUAGUAC                                                                                                      |
| Primers for shRNA               |                                                                                                                              |
| ARID1A-shRNA-homo-1             | F:CCGGGCTGTGCAGTAGAGTGTAGACTCGAGTCTACACTCTACTGCACAGGCTTTTTG<br>R:AATTCAAAAAGCCTGTGCAGTAGAGTGTAGACTCGAGTCTACACTCTACTGCACAGGC  |
| ARID1A-shRNA-homo-2             | F:CCGGGCTGCCACGTGTGTATATACTCGAGTATATACACACGTGGCAGCTTTTTG<br>R:AATTCAAAAAGCTGCCACGTGTGTATATACTCGAGTATATACACACGTGGCAGC         |
| ARID1A-shRNA-homo-3             | F:CCGGGCGAGACACAGCTATTTAATCCTCGAGGATTAATAGCTGTGTCTCGCTTTTTG<br>R:AATTCAAAAAGCGAGACACAGCTATTTAATCCTCGAGGATTAATAGCTGTGTCTCGC   |
| IKK $\beta$ -shRNA-homo-1       | F:CCGGGCTGATTGTGTGTGTGAAACACTCGAGTGTTCACACACACAATCAGCTTTTTG<br>R:AATTCAAAAAGCTGATTGTGTGTGTGAAACACTCGAGTGTTCACACACACAATCAGC   |
| IKK $\beta$ -shRNA-homo-2       | F:CCGGGGACAGTGTCCAATTCAAATCCTCGAGGATTTGAATTGGACACTGTCTTTTTG<br>R:AATTCAAAAAGGACAGTGTCCAATTCAAATCCTCGAGGATTTGAATTGGACACTGTCC  |
| IKK $\beta$ -shRNA-homo-3       | F:CCGGGGATTGAGCTTCTCCTAAACACTCGAGTGTAGGAGAAGCTGAATCCTTTTTG<br>R:AATTCAAAAAGGATTGAGCTTCTCCTAAACACTCGAGTGTAGGAGAAGCTGAATCC     |
| Arid1a-shRNA-mus-1              | F:CCGGCAGGCCCTATGGCCCTAATATCTCGAGATATTAGGGCCATAGGGCCTGTTTTG<br>R:AATTCAAAAACAGGCCCTATGGCCCTAATATCTCGAGATATTAGGGCCATAGGGCCTG  |
| Arid1a-shRNA-mus-2              | F:CCGGTGCCCAAGATCGAGGTTATATCTCGAGATATAACCTCGATCTTGGGCATTTTTG<br>R:AATTCAAAAATGCCCAAGATCGAGGTTATATCTCGAGATATAACCTCGATCTTGGGCA |
| Primers for real-time RT-qPCR   |                                                                                                                              |
| A20-mus                         | F:ACTGGAATGACGAATGGGACA R:CAGGGAATTGACTGAAGTCCAC                                                                             |
| Cxcl1-mus                       | F:ACTGCACCCAAACCGAAGTC R:TGGGGACACCTTTTAGCATCTT                                                                              |
| Cxcl2-mus                       | F:CCAACCACCAGGCTACAGG R:GCGTCACACTCAAGCTCTG                                                                                  |
| Cxcl3-mus                       | F:GATTTTGAGACCATCCAGAGC R:CTCTTCAGTATCTTCTTGATG                                                                              |
| Cxcl9-mus                       | F:GGAGTTCGAGGAACCCTAGTG R:GGGATTTGTAGTGGATCGTGC                                                                              |
| Cxcl10-mus                      | F:CAAAGTGTCTGCCGTCATTTTC R:GGCTCGCAGGGATGATTTCAA                                                                             |
| Cxcl11-mus                      | F:GTAACCAGTCAGCCTGAG R:GCTTTCTCCAGGACTCTTG                                                                                   |
| Ccl2-mus                        | F:GGCCTGTCTTACAGTTG R:CTGCTGGTGATCCTCTTGTAG                                                                                  |
| Ccl3-mus                        | F:CTGCAACCAAGTCTTCTCAG R:GCCGGTTTCTCTTAGTCAGG                                                                                |
| Ccl4-mus                        | F:CTTCTGTGCTCCAGGGTTCTC R:CTGTCTGCCTCTTTGGTCAG                                                                               |
| Ccl5-mus                        | F:GCTGCTTTGCTACCTCTCC R:TCGAGTGACAAACACGACTGC                                                                                |
| Arid1a-mus                      | F:CTTCCCAACACCAGTACAA R:CTGTGCGAAGGACGACAGAC                                                                                 |
| Arid1b-mus                      | F:GTTGTATGGGATGGTACTCACC R:CTGGTTGTAGTATGGTGCTG                                                                              |
| Ar-mus                          | F:CTGGGAAGGGTCTACCCAC R:GGTGCTATGTTAGCGGCCTC                                                                                 |
| Tmprss2-mus                     | F:CAGTCTGAGCACATCTGTCCT R:CTCGGAGCATACTGAGGCA                                                                                |
| Ck8-mus                         | F:TCCATCAGGGTGACTCAGAAA R:CCAGCTTCAAGGGGCTCAA                                                                                |
| Ck18-mus                        | F:CAGCCAGCGTCTATGCAGG R:CTTTCTCGGTCTGGATTCCAC                                                                                |
| Ck5-mus                         | F:TCTGCCATACCCCATCTGT R:CCTCCGCCAGAAGTGTAGGA                                                                                 |
| Trp63-mus                       | F:TACTGCCCCGACCCTTACAT R:GCTGAGGAAGTCTGCTGTCTG                                                                               |
| Ezh2-mus                        | F:AGTGACTTGGATTTTCCAGCAC R:AATTCTGTTGTAAGGGCGACC                                                                             |
| Sox2-mus                        | F:GCGGAGTGGAAACTTTTGTCC R:CGGGAAGCGTGTACTTATCCTT                                                                             |
| Ascl1-mus                       | F:GCAACCGGGTCAAGTTGGT R:GTCGTTGAGTAGTTGGGGG                                                                                  |
| Brg1-mus                        | F:CAAAGACAAGCATCTCTAGCCA R:CACGTAGTGTGTGTTAAGGACC                                                                            |
| Baf155-mus                      | F:AGCTAGATTCGGTGCGAGTCT R:CCACCAGTCCAGCTAGTGTTTT                                                                             |
| Actl6a-mus                      | F:GTGTACGGCGGAGATGAAGTT R:GGGAAATCAACCTTAGGGCAGT                                                                             |
| Actl6b-mus                      | F:GCGCTCGTCTTTGACATTGG R:ATTGGTGTGATGTGGAAAATCT                                                                              |
| Brm-mus                         | F:CTCCTGGACCAATTCTGGGG R:CATCGTTGACAGAGGATGTGAG                                                                              |
| Dpf1-mus                        | F:GAGGCCATCGAGCACTGTC R:CGGGCGGGTAAGTGTAGA                                                                                   |
| $\beta$ -actin-mus              | F:GGCTGTATCCCCTCCATCG R:CCAGTTGGTAACAATGCCATGT                                                                               |
| ARID1A-homo                     | F:CCTGAAGAAGTCCGACGGGAA R:TCCGCCATGTTGTTGGTGG                                                                                |
| Primers for sgRNA               |                                                                                                                              |
| Arid1a-sgRNA-mus-1              | F:CACCGGCAGCTGCGAAGATATCGGG R:AAACCCCGATATCTTCGAGCTGCC                                                                       |
| Arid1a-sgRNA-mus-2              | F:CACCGTTCGGTAAAGATCGTGAG R:AAACCTGCACGATCTTACCAGGAA                                                                         |
| Primers for real-time Chip-qPCR |                                                                                                                              |
| A20-mus                         | F:CAAATCCCTCTACTTACAATCCC R:ACCGAAATCACCTCTGTATGTT                                                                           |
| Primers for enhancer RNA        |                                                                                                                              |
| A20-eRNA-mus                    | F:TGGCAGGCATTCAGACTACAAA R:AGAGCTTAAAGCAGGGTAGCAAA                                                                           |
